# Supplementary material for: Dual Role of Topoisomerase II in Centromere Resolution and Aurora B Activity
Source: PLOS journal article supplement (doi:10.1371/journal.pbio.0060207), 2008-08-22

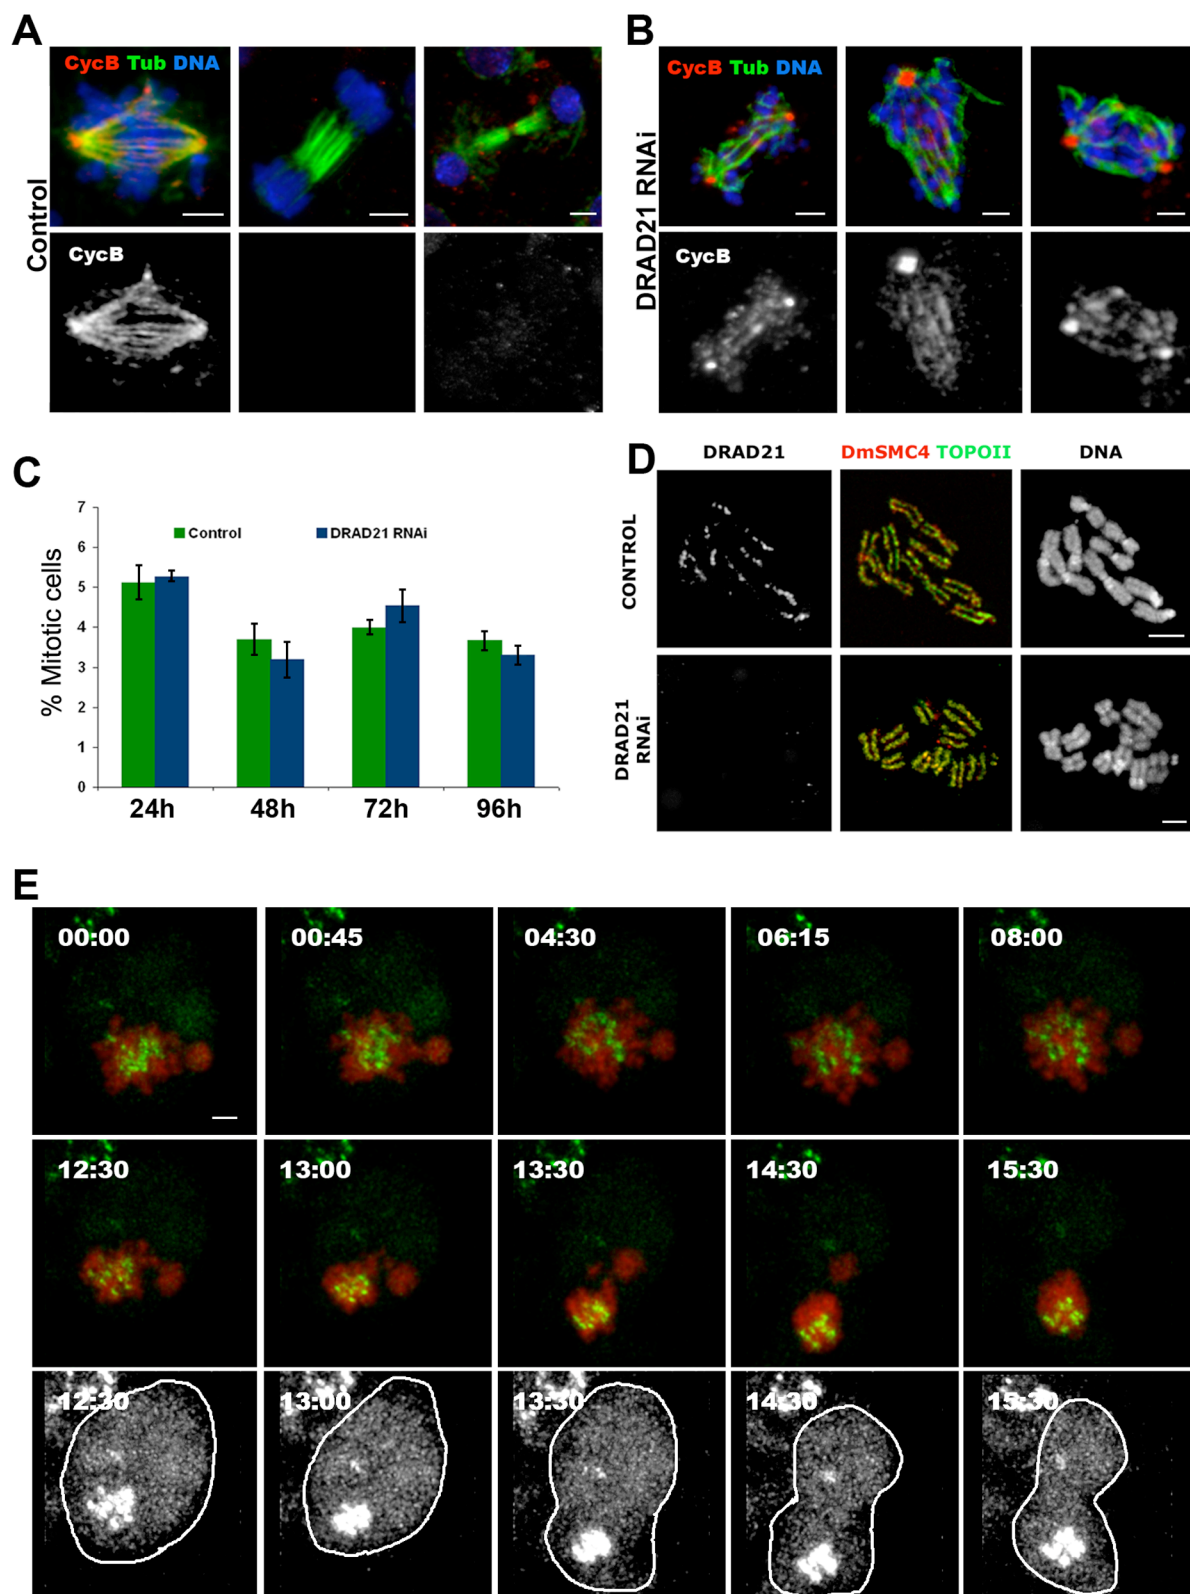

Supplement: S5 (10.1371/journal.pbio.0060207.s005) [file journal.pbio.0060207.s005]
